# Supplementary material for: A green-by-design system for efficient bio-oxidation of an unnatural hexapyranose into chiral lactone for building statin side-chains
Source: Royal Society of Chemistry journal article supplement (doi:10.1039/c6cy01085g), 2016-01-01
Supplement: c6cy01085g1.pdf [file c6cy01085g1.pdf]

## Supporting Information

### A green-by-design system for efficient bio-oxidation of an unnatural hexapyranose into chiral lactone for building statin side- chains

Laboratory of Biocatalysis and Synthetic Biotechnology, State Key Laboratory of  
Bioreactor Engineering, East China University of Science and Technology, 130  
Meilong Road, Shanghai 200237, China.

\* To whom correspondence should be addressed. Fax: +86-21-6425-0840; E-mail:  
panjiang@ecust.edu.cn (J.P.); jianhexu@ecust.edu.cn (J.H.X.).

#### Table of Contents

1. Figure S1. Ramachandran plot and errat result of *Le*ADH homology structure.
2. Figure S2. Spectra of size-exclusion chromatography of *Le*ADH.
3. Figure S3. Multiple sequence alignment of *Le*ADH with proteins from different sources
4. Figure S4. Characterization of *Le*ADH.
5. Figure S5. Stability of CTeHP and CTeHL in aqueous medium at various pH
6. Table S1. Primers used in this work.
7. Table S2. Effect of metal ions and EDTA on *Le*ADH activity.
8. Figure S6. Schematic presentation of the plasmid containing *adh* and *nox* genes and analysis of expression level by SDS-PAGE

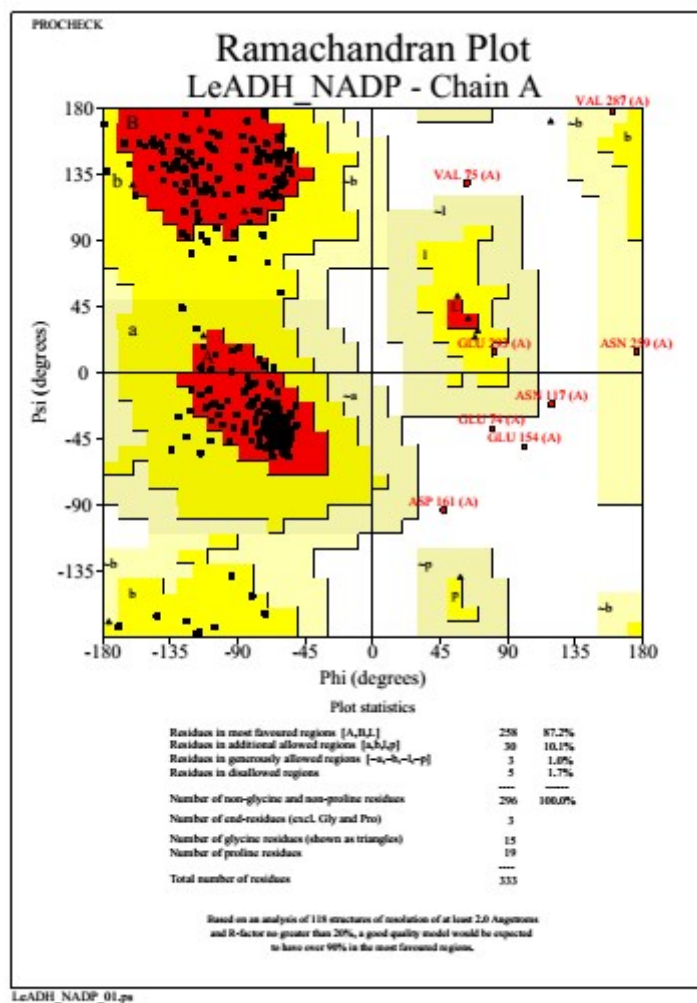

Program: ERRAT2  
 File: /var/www/SAVES/Jobs/34544970/erratt.pdb  
 Chain#: 1  
 Overall quality factor\*: 79.567

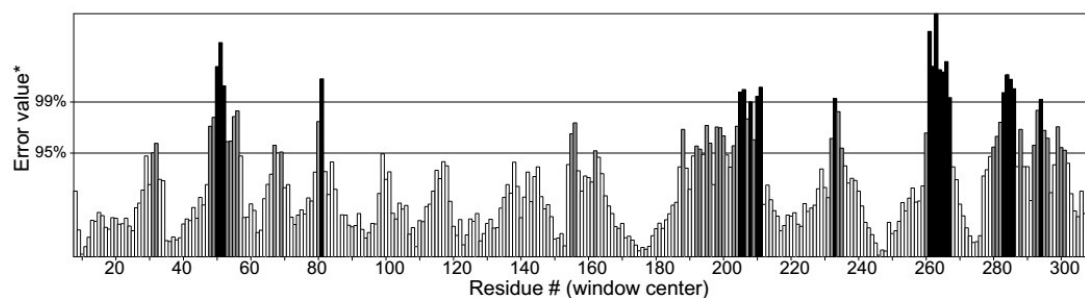

\*On the error axis, two lines are drawn to indicate the confidence with which it is possible to reject regions that exceed that error value.

\*\*Expressed as the percentage of the protein for which the calculated error value falls below the 95% rejection limit. Good high resolution structures generally produce values around 95% or higher. For lower resolutions (2.5 to 3Å) the average overall quality factor is around 91%.

**Figure S1.** Ramachandran plot and errat result of *LeADH* homology structure.

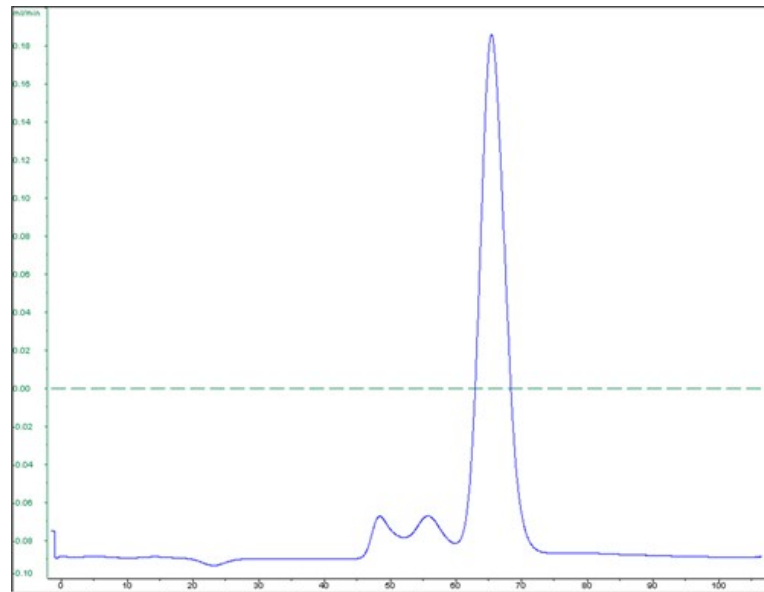

**Figure. S2** Spectra of size-exclusion chromatography on superdex 75, elution volume of *Le*ADH is 66.0 mL.  $Y = -12.955\ln(X) + 111.8$  (Y: elution volume; X: molecular weight), the molecular weight determined to be 33 kDa.

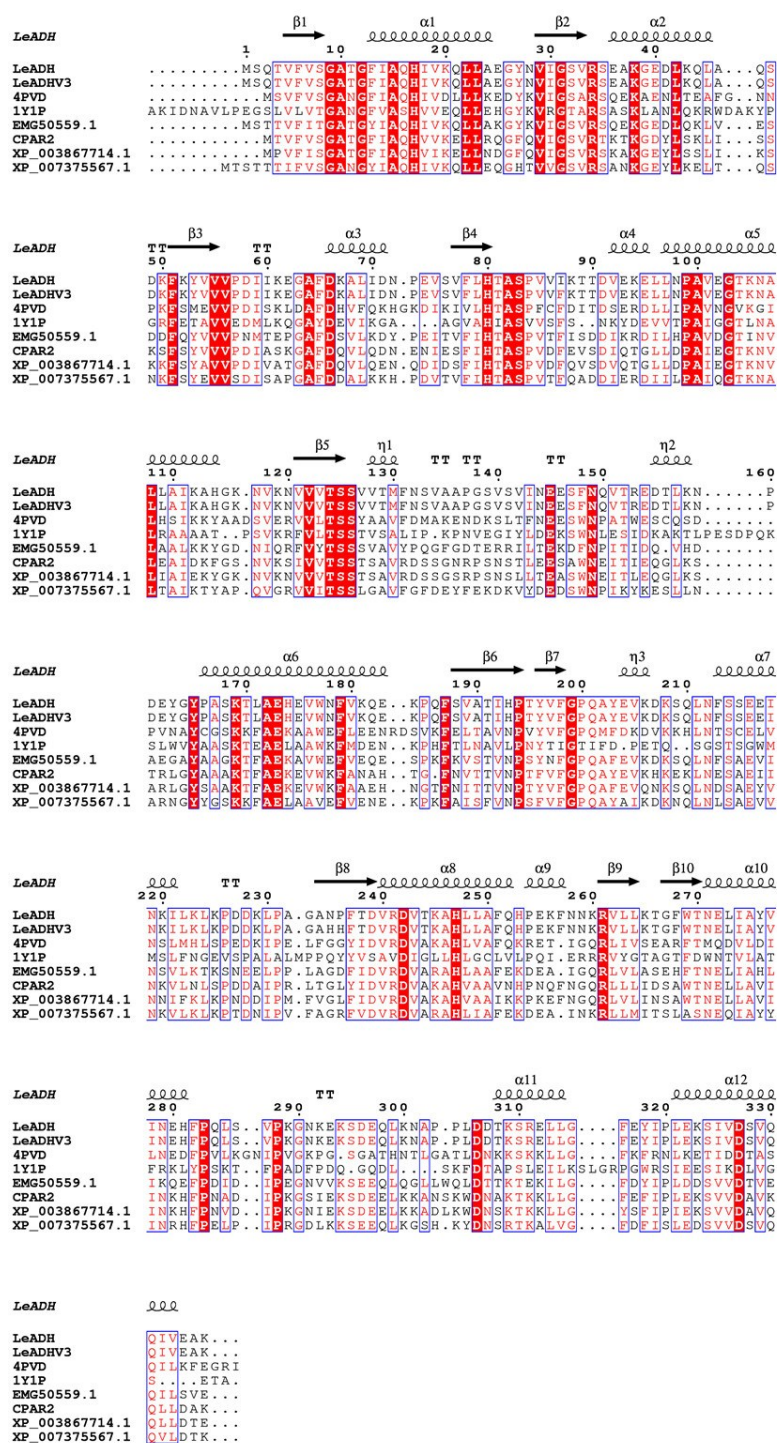

**Figure S3.** Multiple sequence alignment of *LeADH* with proteins from different sources. Conserved residues are shaded in red background. The catalytic residues are shown in blue stars. The schematic diagram of secondary structure of *LeADH* is shown on the top of sequence. The  $\alpha$ -helices,  $3_{10}$ -helices and  $\pi$ -helices are displayed as medium, small and large squiggles respectively.  $\beta$ -strands are rendered as arrows, strict  $\beta$ -turns as TT letters and strict  $\alpha$ -turns as TTT.

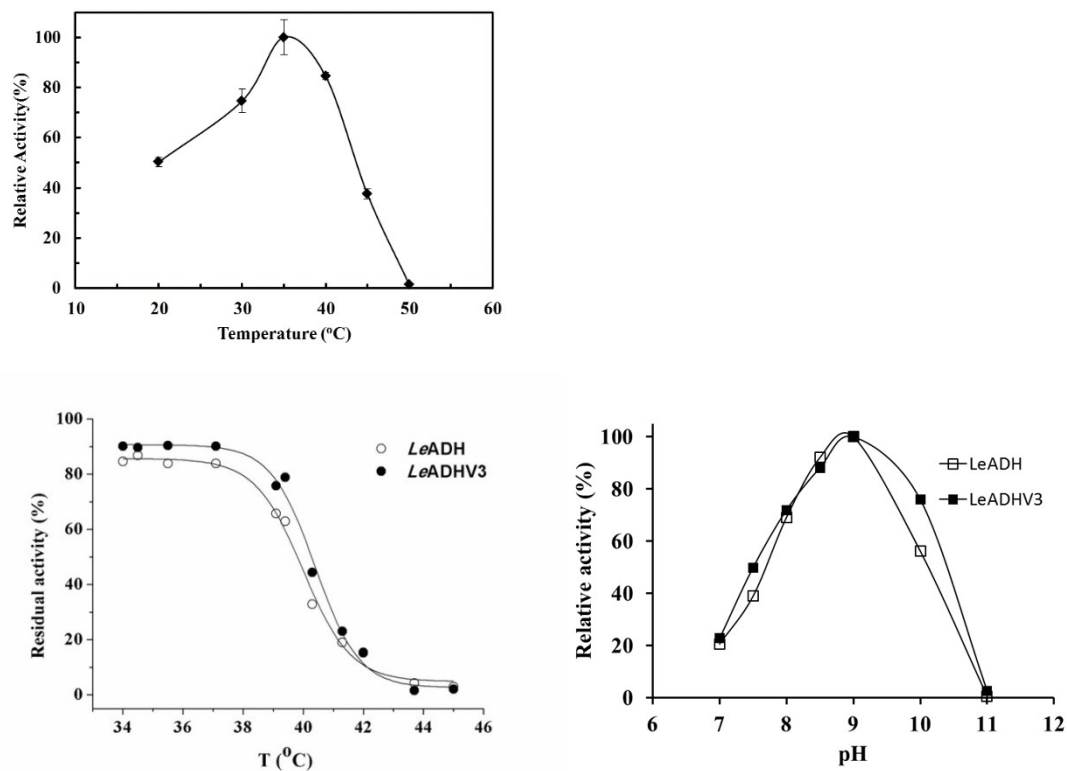

**Figure S4.** characterization of *LeADH*. The optimum temperature of *LeADH* was determined at different temperatures in the range of 20-50°C under standard conditions. The maximum activity was observed at around 35°C. The thermal stability of *LeADH* was also examined by incubating the purified enzymes (0.1 mg/mL) at different temperatures for 15 min, and the residual activity was assayed. The results showed that  $T_{1/2}$  of *LeADH* and *LeADHV3* was 39.6°C and 40.1°C, respectively. The enzyme activity was determined under standard assay condition at various pH (7.0-11.0), the *LeADH* displayed the highest activity at pH 9.0.

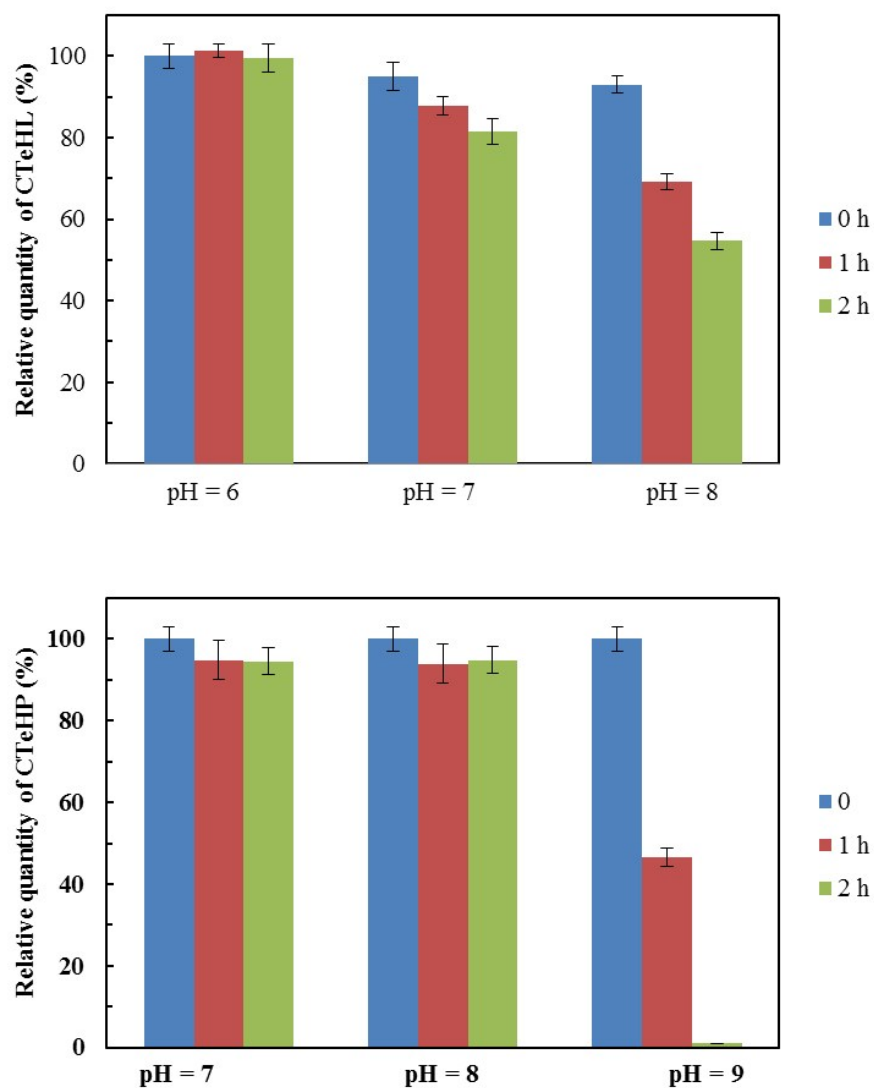

**Figure S5.** Stability of CTeHP and CTeHL in aqueous medium at various pH. 10 g L<sup>-1</sup> of CTeHP and CTeHL were incubated at 30 °C and sampled after 60 and 120 minutes. Data are relative values to the initial GC-FID area of the CTeHP and CTeHL peaks.

**Table S1.** Primers used in this work.

---

|                   |                                                        |
|-------------------|--------------------------------------------------------|
| <i>Le</i> ADH_for | ACGGAATTCATGTCACAAACTGTCTTT ( <i>Eco</i> R I)          |
| <i>Le</i> ADH_rev | CCCAAGCTTTTACTTGGCTTCCACAA ( <i>Hind</i> III)          |
| 85&87_for         | CTTCACACAGCATCACCCNDTGTTNDTAAGACCACAGATGTTGAA          |
| 85&87_rev         | TTCAACATCTGTGGTCTTAHNAACAHNNGGGTGATGCTGTGTGAAG         |
| 127&128_for       | ACGTTGTGGTACTTCTTCTNDTNDTACAATGTTTAATCCGTAGC           |
| 127&128_rev       | GCTACGGAATTAAACATTGTAHNAHNAGAAGAAGTAACCACAACGT         |
| 129&131_for       | TGGTACTTCTTCTGTTGTCNDTATGNDTAATTCCGTAGCTGCACCCG        |
| 129&131_rev       | CGGGTGCAGCTACGGAATTAHNCATAHNGACAACAGAAGAAGTAACCA       |
| 161&162_for       | ACACATTGAAGAATCCTNDTNDITACGGATACCCAGCATC               |
| 161&162_rev       | GATGCTGGGTATCCGTAAHNAHNAGGATTCTTCAATGTGT               |
| 195&196_for       | CTCAGTTGCCACAATCCATCCANDTNDTGTTCGGTCCCCAAG             |
| 195&196_rev       | CTTGGGGACCGAAAACAHNNAHNTGGATGGATTGTGGCAACTGAG          |
| 213&217_for       | ggacaaaagtcagttgaacNDTtcaagtgagNDTataaacaagatttgaagctg |
| 213&217_rev       | cagctcaaaatctgtttatAHNctcactgaAHNgttcaactgactttgtcc    |
| 235&236_for       | ACAAACTTCCAGCAGGTGCTNDTNDTTTTACTGACGTGAGAGAC           |
| 235&236_rev       | GTCTCTCACGTCAGTAAAHAHNAHNAGCACCTGCTGGAAGTTTGT          |
| V3_for            | TTCCATATGATGTCACAAACTGTCTTTGTC ( <i>Nde</i> I)         |
| V3_rev            | TATCTCGAGTTACTTGGCTTCCACAATTG ( <i>Xho</i> I)          |
| <i>Sm</i> NOX_for | CCGGAATTCATGTCGAAAATTGTTATCG ( <i>Eco</i> R I)         |
| <i>Sm</i> NOX_rev | CACGTCGACTTATTTGCTTTCAGAGC ( <i>Sal</i> I)             |
| V3_for            | CCGGAATTCATGTCACAAACTGTCTTTGTC ( <i>Eco</i> R I)       |

---

---

V3\_rev      CACGTCGACTTACTTGGCTTCCACAATTTG (*Sal* I)

*Sm*NOX\_for    TTCATATGATGTCGAAAATTGTTATCG (*Nde* I)

*Sm*NOX\_rev    TATCTCGAGTTATTTCGCTTTCAGAGC (*Xho* I)

---

**Table S2** Effect of metal ions and EDTA on *LeADH* activity.

| Metal ion (1 mM) | Relative activity (%) |
|------------------|-----------------------|
| Zn <sup>2+</sup> | 93.8 ± 3.1            |
| Ni <sup>2+</sup> | 97.9 ± 3.1            |
| Mg <sup>2+</sup> | 94.8 ± 2.1            |
| Cu <sup>2+</sup> | 89.0 ± 5.8            |
| Fe <sup>2+</sup> | 108.2 ± 0.3           |
| Co <sup>2+</sup> | 98.6 ± 3.1            |
| Mn <sup>2+</sup> | 100.3 ± 2.7           |
| Al <sup>3+</sup> | 98.3 ± 1.4            |
| Ca <sup>2+</sup> | 102.1 ± 0.3           |
| Fe <sup>3+</sup> | 101.4 ± 0.3           |
| EDTA             | 98.6 ± 1.0            |

*LeADH* was pre-incubated with various metal ions or EDTA for 30 min at 25°C and the residual activity was determined using the standard assay. Residual activity was expressed as a percentage of the activity obtained without addition any metal ions or EDTA.

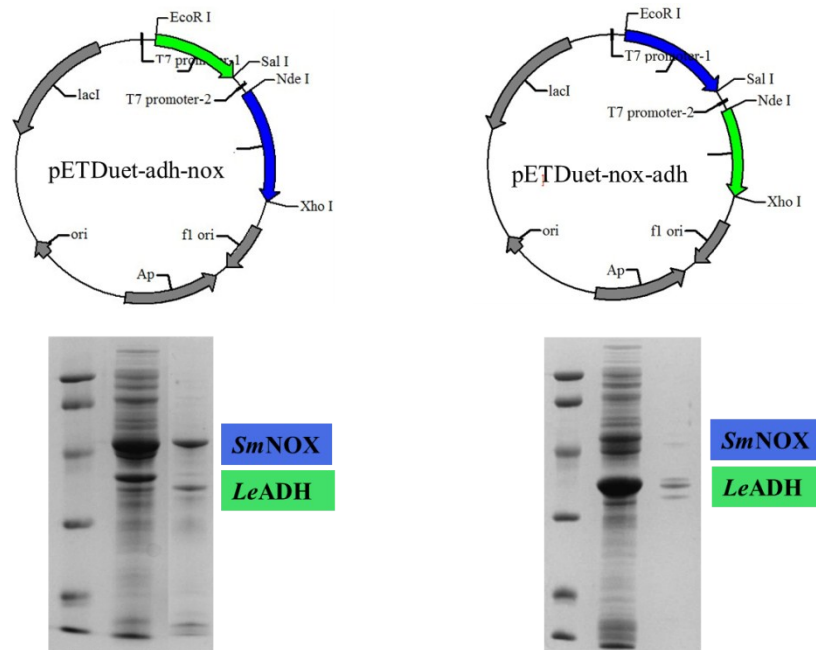

**Figure. S6** Schematic presentation of the plasmid containing *adh* and *nox* genes and analysis of expression level by SDS-PAGE. (A) Structure of the coexpression plasmid pETDuet-*adh-nox*. (B) SDS-PAGE analysis of the pETDuet-*adh-nox* expression. Lane 1, protein marker; Lane 2, soluble fraction of cell-free extract from *E. coli* with pETDuet-*adh-nox*; Lane 3, precipitate fraction. (C) Structure of the coexpression plasmid pETDuet-*nox-adh*. (B) SDS-PAGE analysis of the pETDuet-*nox-adh* expression. Lane 1, protein marker; Lane 2, soluble fraction of cell-free extract from *E. coli* with pETDuet-*nox-adh*; Lane 3, precipitate fraction.
